# Supplementary material
Source: PubMed Central journal article supplement (PMC3133018)
Supplement: supp_193_8_1854__1.pdf [file supp_193_8_1854__1.pdf]

**Supplemental Table 1. Groups of orthologous genes unique to the FRI909 genome, when compared to *S.epidermidis* genomes RP62a and ATCC12228**

| Cluster number | No. of genes | Locus ID and annotation                                                                                                                                                                              |
|----------------|--------------|------------------------------------------------------------------------------------------------------------------------------------------------------------------------------------------------------|
| ORTHOMCL2055   | 2            | GSEF_1912(staphylococcus tandem lipoproteins family protein),GSEF_1913(staphylococcus tandem lipoproteins family protein)                                                                            |
| ORTHOMCL2076   | 2            | GSEF_1608(phytoene desaturase family protein),GSEF_1610(phytoene desaturase family protein)                                                                                                          |
| ORTHOMCL2077   | 2            | GSEF_1518(CAAX amino terminal protease family protein),GSEF_1519(protein of pXO2-46)                                                                                                                 |
| ORTHOMCL2089   | 2            | GSEF_1322(cold shock protein cspD),GSEF_1325(cold shock protein cspD),                                                                                                                               |
| ORTHOMCL2121   | 2            | GSEF_0161(Staphylococcal enterotoxin L),GSEF_0163(Staphylococcal enterotoxin C3)                                                                                                                     |
| ORTHOMCL2124   | 2            | GSEF_0007(conserved hypothetical protein),GSEF_0009(unnamed protein product domain protein)                                                                                                          |
| ORTHOMCL777    | 2            | GSEF_1305(rlx protein),GSEF_1307(rlx protein)                                                                                                                                                        |
| ORTHOMCL1777   | 2            | GSEF_0157(ORF009 domain protein),GSEF_0614(terminase small subunit (GIP)),GSEF_2102(bacteriophage terminase small subunit domain protein)                                                            |
| ORTHOMCL225    | 3            | GSEF_2074(unnamed protein product; no similarity),GSEF_2077(unnamed protein product; no similarity),GSEF_2101(unnamed protein product; no similarity)                                                |
| ORTHOMCL1778   | 3            | GSEF_0151(hypothetical protein),GSEF_0154(conserved hypothetical protein),GSEF_0156(conserved hypothetical protein)                                                                                  |
| ORTHOMCL11     | 3            | GSEF_1345(bacterial mobilisation protein (MobC) family protein), GSEF_2291(bacterial mobilisation protein (MobC) family protein),<br>GSEF_2329(bacterial mobilisation protein (MobC) family protein) |
| ORTHOMCL4      | 3            | GSEF_1315(orf337 domain protein),GSEF_2179(mobilization protein, point mutation), GSEF_2330(orf337 domain protein)                                                                                   |
| ORTHOMCL16     | 4            | GSEF_1687(conserved hypothetical protein),GSEF_1688(conserved hypothetical protein),GSEF_1689(conserved hypothetical protein),GSEF_1691(conserved hypothetical protein)                              |
| ORTHOMCL18     | 4            | GSEF_1340(truncated replication protein),GSEF_1790(initiator Replication family protein),GSEF_2178(initiator Replication family protein),GSEF_2321(initiator Replication family protein)             |
| ORTHOMCL23     | 4            | GSEF_0012(hypothetical protein),GSEF_0150(hypothetical protein),GSEF_0153(hypothetical protein),GSEF_0155(hypothetical protein),                                                                     |

**Supplemental Table 2. PCR primers for screening additional *S. epidermidis* strains for presence of the SePI element**

| <b>Gene</b>                          | <b>Forward Primer</b>        | <b>Reverse Primer</b>        | <b>Expected Size (bp)</b> | <b>GenBank Accession</b>                       |
|--------------------------------------|------------------------------|------------------------------|---------------------------|------------------------------------------------|
| sea                                  | 5'-GCAGGGAACAGCTTTAGGC       | 5'-GTTCTGTAGAAGTATGAAACACG   | 521                       | M18970                                         |
| seb                                  | 5'-ACATGTAATTTTGATATTCGCACTG | 5'-TGCAGGCATCATGCATACCA      | 667                       | M11118                                         |
| sec                                  | 5'-CTTGATGTATGGAGGAATAACAA   | 5'-TGCAGGCATCATGCATACCA      | 284                       | X05815(sec1)<br>AY450554(sec2)<br>X51661(sec3) |
| sed                                  | 5'-GTGGTGAATAGATAGGACTGC     | 5'-ATATGAAGGTGCTCTGTGG       | 385                       | M28521                                         |
| see                                  | 5'-TACCAATTAAGTTGGATAGAC     | 5'-CTCTTTGCACCTTACCGC        | 171                       | M21319                                         |
| seg                                  | 5'-CGTCTCCACCTGTTGAAGG       | 5'-CCAAGTGATTGTCTATTGTCG     | 328                       | AF064773                                       |
| seh                                  | 5'-CAACTGCTGATTAGCTCAG       | 5'-GTCGAATGAGTAATCTCTAGG     | 359                       | U11702                                         |
| sei                                  | 5'-CAACTCGAATTTCAACAGGTACC   | 5'-CAGGCAGTCCATCTCCTG        | 466                       | AF064774                                       |
| sej                                  | 5'-CATCAGAAGCTGTTCCGCTAG     | 5'-CTGAATTTTACCATCAAAGGTAC   | 142                       | AF053140                                       |
| 16s                                  | 5'-GTAGGTGGCAAGCGTTATCC      | 5'-CGCACATCAGCGTCAG          | 228                       | X68417                                         |
| <b>GSEF Locus ID/Function</b>        | <b>Forward Primer</b>        | <b>Reverse Primer</b>        | <b>Expected Size (bp)</b> |                                                |
| GSEF_0619/SePI-Integrase             | 5'-AGACACATACAACAACCATTTGC   | 5'-ATACTTGCACCATGATTGACTAGC  | 724                       |                                                |
| GSEF_0613/SePI-Hypothetical          | 5'-AATGAAAGAGCTTGGATTCAATG   | 5'-CGCGTTTCATCTTTAAACTTTTC   | 524                       |                                                |
| GSEF_0617/SaPI1028 Packaging protein | 5'-ATACATTAAACGAACAAGCACAAAC | 5'-CTCATTTTCTGTTACAACACACACC | 356                       |                                                |
